# Supplementary material
Source: PubMed Central journal article supplement (PMC2670652)
Supplement: 00509.2008_3.pdf [file 00509.2008_3.pdf]

**Fig. 2.** *NIS mRNA and protein expression along the villus-crypt axis.*

**A)** Total RNA was extracted from enterocytes sequentially isolated, in nine fractions, from the small intestine along the villus-crypt axis as described in Materials and Methods. Differential expression of NIS mRNA was analyzed by RT-PCR and standardized with respect to  $\beta$ -actin mRNA expression. Purity of the villus-crypt fraction separation was confirmed by analysis of the expression of ALP (a villus marker) and PCNA (a crypt marker) mRNAs. Densitometric ratios of NIS, PCNA, and ALP over  $\beta$ -actin expression are shown; **B)** ALP activity from villus-tip epithelial cells in fractions A (homogenate); B (nonpurified apical membranes); and C (enriched apical membranes). **C)** NIS immunoblot: Lane 1: FRTL-5 cell membranes (10  $\mu$ g); lanes 2-4, fractions A, B, or C (50  $\mu$ g). *Lower panel:* Ezrin immunoblot as loading control after stripping anti-NIS antibodies. Boxes indicate different gels.

**Fig. 5.** *A high-I<sup>-</sup> diet reduces intestinal I<sup>-</sup> transport and NIS protein in vivo.*

Rats were provided water (control) or 0.05% KI-supplemented water. After the indicated times, BBMVs were purified as described in Materials and Methods and **A)** a steady-state  $I^-$  uptake assay was performed with 50  $\mu$ g protein and 20  $\mu$ M  $^{125}I^-$  alone (gray bars) or in the presence of 80  $\mu$ M  $ClO_4^-$  (dark bars). **B)** BBMVs (100  $\mu$ g) were also used for immunoblot and probed with anti-NIS and, after stripping the nitrocellulose, anti-ezrin antibodies. Ezrin was probed as a loading control, as described in Materials and Methods. Boxes indicate different gels. **C)** Quantitation of the NIS/ezrin densitometric signal was done with ImageJ (NIH).
