# Supplementary material
Source: PubMed Central journal article supplement (PMC2670652)

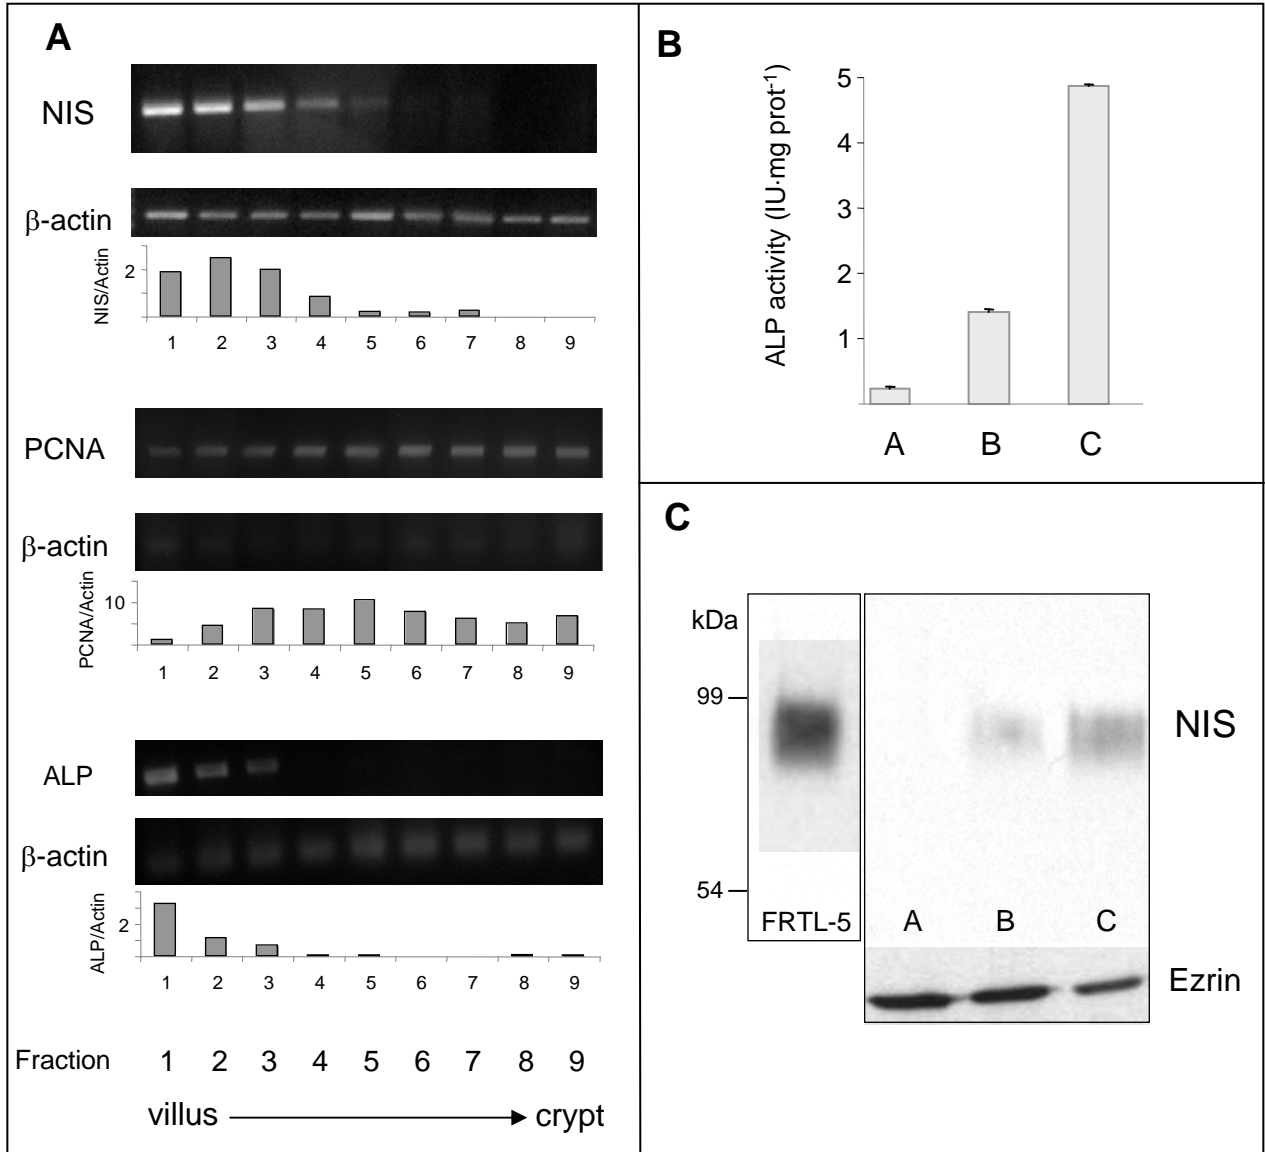

Figure 2

Supplement: 00509.2008_1.pdf [file 00509.2008_1.pdf]

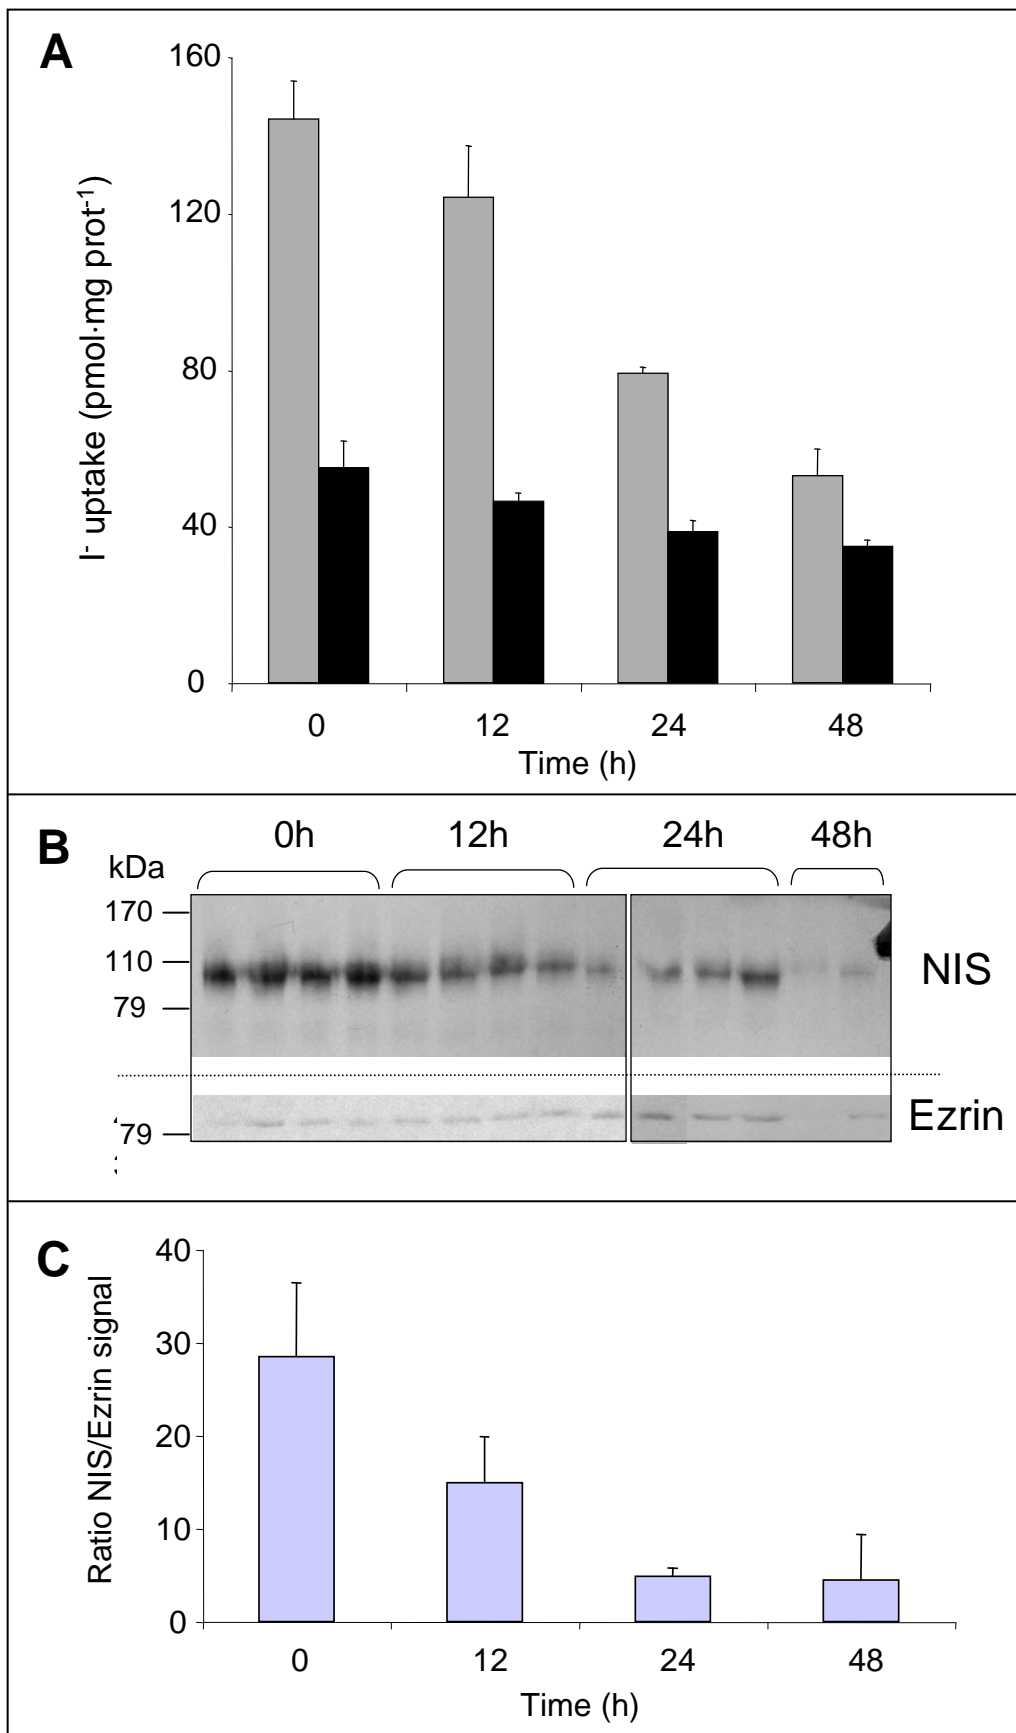

Figure 5

Supplement: 00509.2008_2.pdf [file 00509.2008_2.pdf]
